# Supplementary material for: CobWeb 1.0: machine learning toolbox for tomographic imaging
Source: Copernicus journal article supplement (doi:10.5194/gmd-13-315-2020), 2020-01-31
Supplement: Supplementary file 1 [file gmd-13-315-2020-supplement.zip]

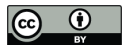

## *Supplement of*

# **CobWeb 1.0: machine learning toolbox for tomographic imaging**

**Swarup Chauhan et al.**

*Correspondence to:* Swarup Chauhan (ssschauhan@gmail.com)

- gmd-13-315-2020-supplement-title-page.pdf
- Supplement\_material
  - CobWeb\_User\_Guide.pdf
  - Code.pdf
  - Licenses.pdf

The copyright of individual parts of the supplement might differ from the CC BY 4.0 License.
