# Supplementary material for: CobWeb 1.0: machine learning toolbox for tomographic imaging
Source: Copernicus journal article supplement (doi:10.5194/gmd-13-315-2020), 2020-01-31
Supplement: Supplementary file 2 [file gmd-13-315-2020-supplement.zip]

[CobWeb 1.0](#) License statement and permissions for [CobWeb 1.0](#) package.  
Copyright (C) 1993--2019

---

#### Citation

This software is distributed free of charge. If you use it in research resulting in a scientific presentation or publication, the software should be acknowledged and cited as:

Chauhan Swarup, Sell Kathleen, Enzmann Frieder, Rühaak Wolfram, Wille Thorsten, Sass Ingo and Kersten Michael.

[CobWeb 1.0: machine learning tool box for tomographic imaging](#)

Zenodo : OpenAIRE. Vol. 2018, Issue December. Genève, : CERN, 2018.

---

#### License

[CobWeb 1.0](#) is distributed under the  
"Creative Commons License Version 4.0", available at  
<http://creativecommons.org/licenses/by-nc-sa/4.0/>

You are not allowed:

To reuse and redistribute the APS GmbH and Technische Universität Darmstadt Logos

You are free:

To Share -- copy and redistribute the material in any format

To Adapt -- remix, transform, and build upon the material

Under the following conditions:

Attribution -- You must give appropriate credit, provide a link to the license, and indicate if changes were made. You may do so in any reasonable manner, but not in any way that suggests the licensor endorses you or your use.

Noncommercial -- You may not use the material for commercial purposes.

Share A like -- If you remix, transform, or build upon the material, you must distribute your contributions under the same license as the original.

See the above link for the full text of the license.

---

#### Disclaimer

This software is provided 'as-is', without any express or implied warranty. In no event will the author(s) be held liable for any damages arising from the use of this software.

---
